# Supplementary material for: Heterogeneous Pattern of Dependence on Anti-Apoptotic BCL-2 Family Proteins upon CHOP Treatment in Diffuse Large B-Cell Lymphoma
Source: MDPI journal article supplement (doi:10.3390/ijms20236036), 2019-11-30

**A****Venetoclax in DLBCL cell lines**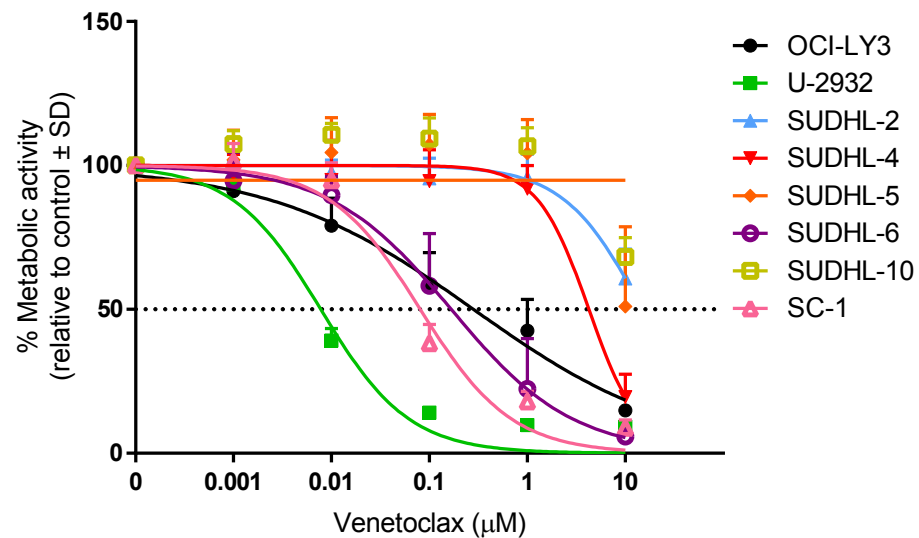**B****S63845 in DLBCL cell lines**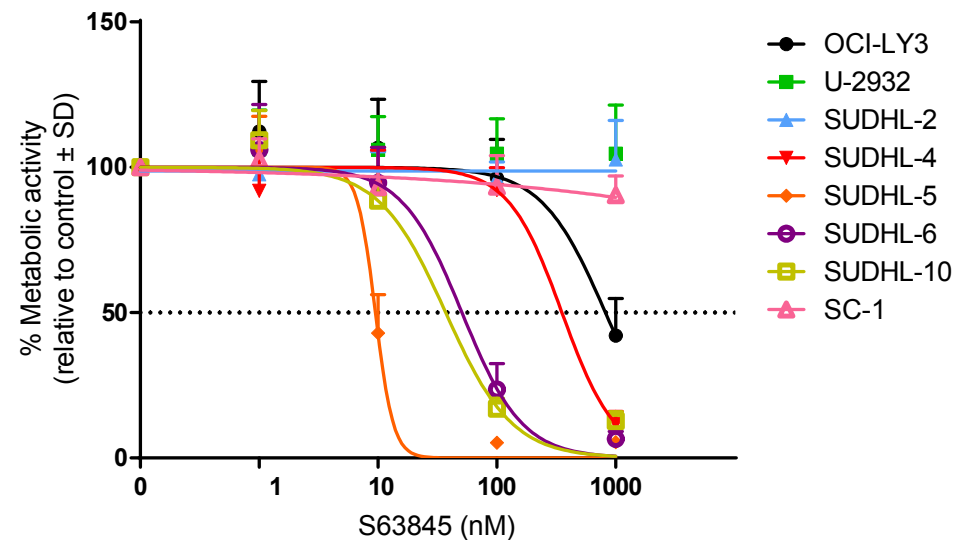**C****Navitoclax in DLBCL cell lines**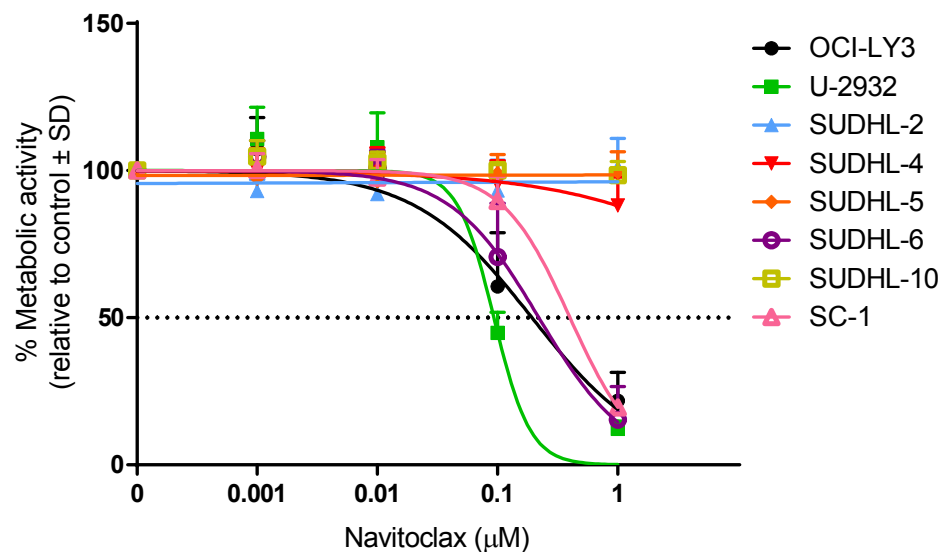**D****DLBCL cell lines - CHOP  $\mu$ g/mL**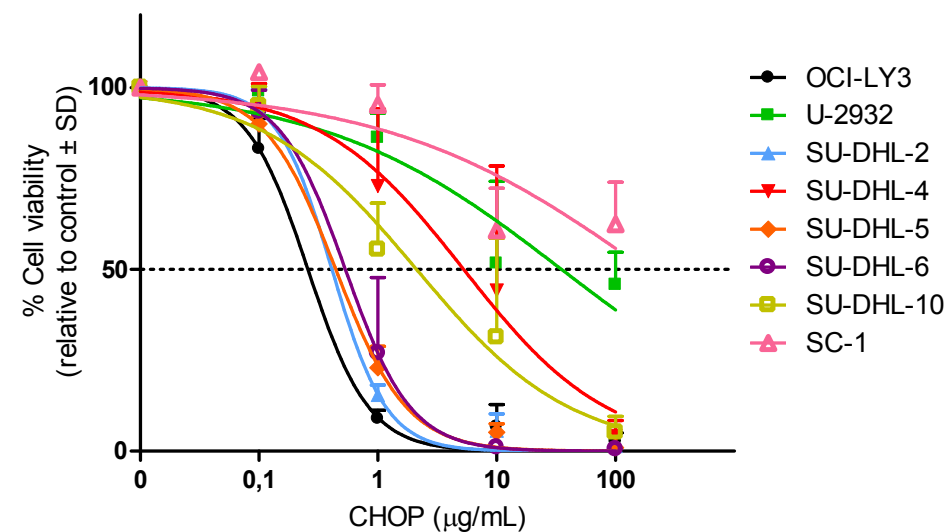

Supplement: s1 [file s1]
