# Supplementary figures and images for: Heterogeneous Pattern of Dependence on Anti-Apoptotic BCL-2 Family Proteins upon CHOP Treatment in Diffuse Large B-Cell Lymphoma
Source: MDPI journal article supplement (doi:10.3390/ijms20236036), 2019-11-30

# BIM

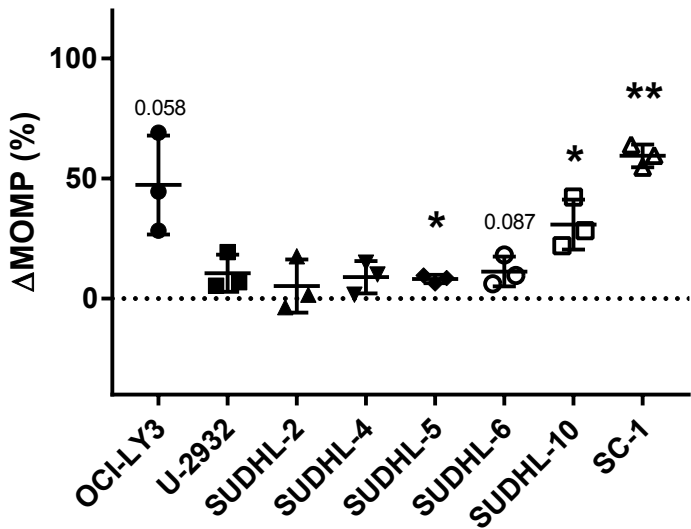

Supplement: s1 [file s1]

**A**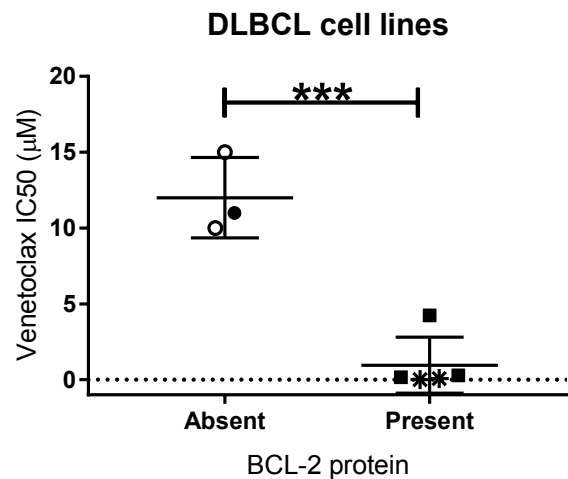**B**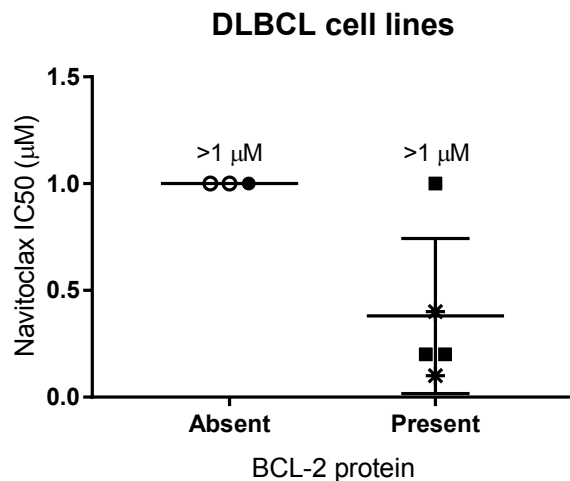**C**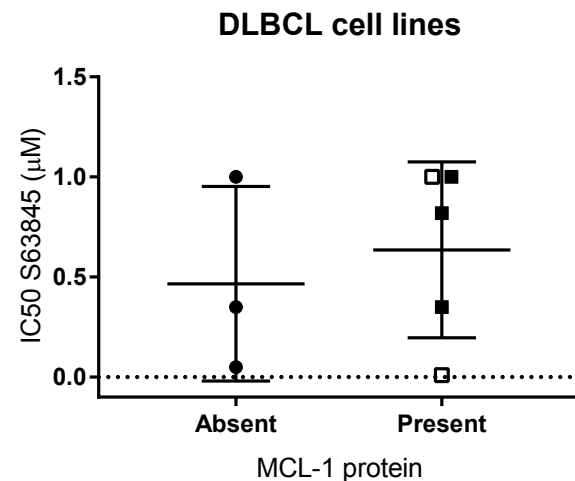**D**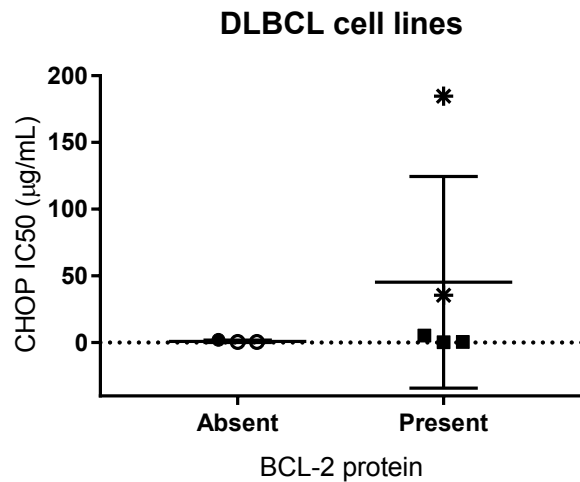**E**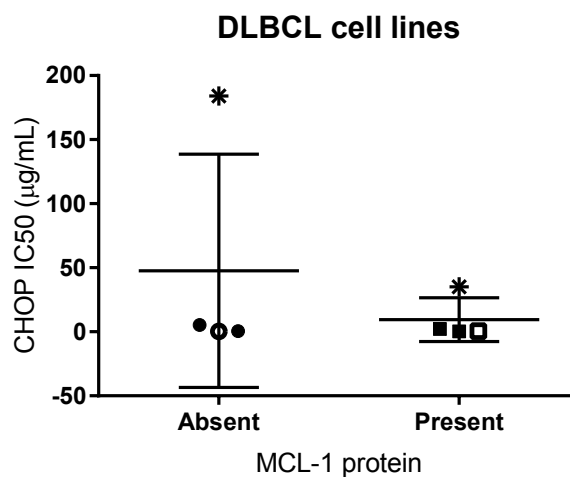

Supplement: s1 [file s1]

# B

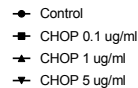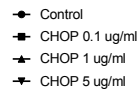

**C**

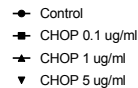

Supplement: s1 [file s1]

OCI-LY3

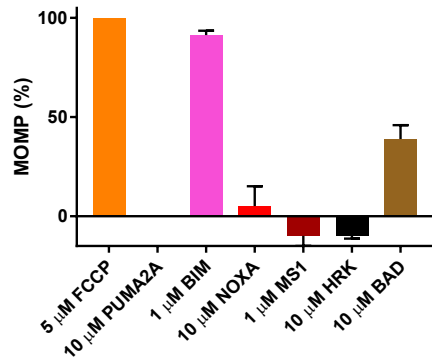

U-2932

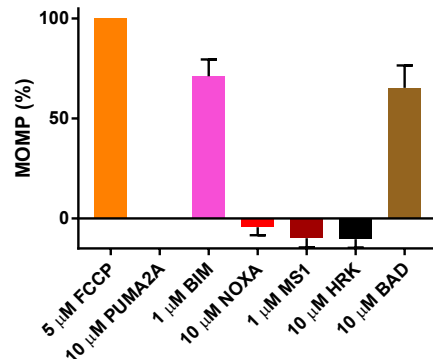

SUDHL-2

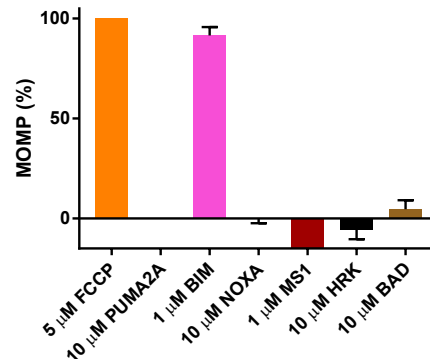

SUDHL-4

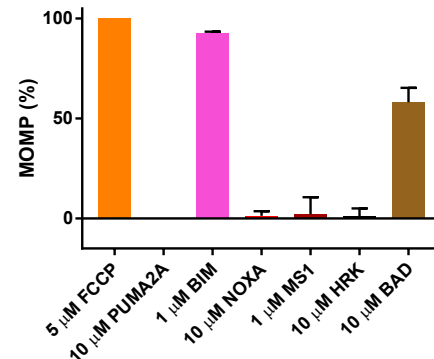

SUDHL-5

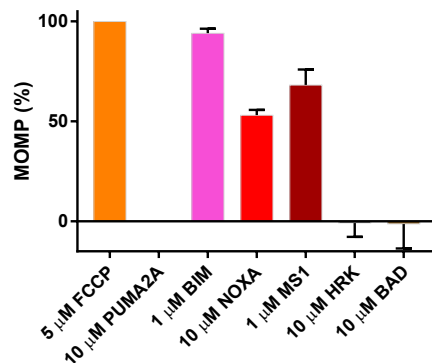

SUDHL-6

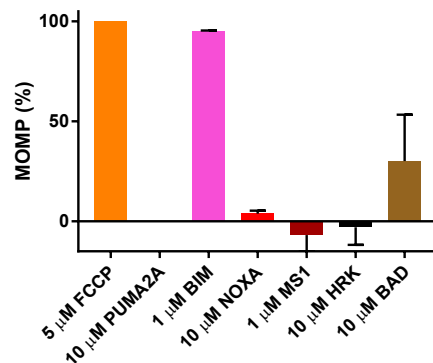

SUDHL-10

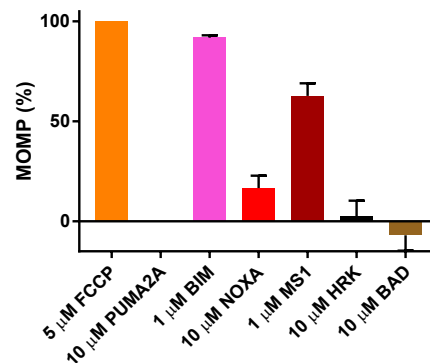

SC-1

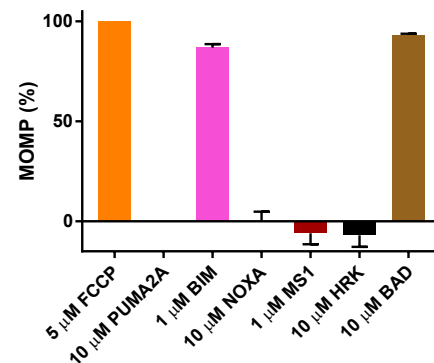

Supplement: s1 [file s1]
